# Supplementary material for: Ethnicity and COVID-19 outcomes among healthcare workers in the UK: UK-REACH ethico-legal research, qualitative research on healthcare workers’ experiences and stakeholder engagement protocol
Source: PubMed Central journal article supplement (PMC8275361; doi:10.1136/bmjopen-2021-049611), 2021-07-09
Supplement: bmjopen-2021-049611.draft_revisions.pdf [file bmjopen-2021-049611.draft_revisions.pdf]

# BMJ Open

BMJ Open is committed to open peer review. As part of this commitment we make the peer review history of every article we publish publicly available.

When an article is published we post the peer reviewers' comments and the authors' responses online. We also post the versions of the paper that were used during peer review. These are the versions that the peer review comments apply to.

The versions of the paper that follow are the versions that were submitted during the peer review process. They are not the versions of record or the final published versions. They should not be cited or distributed as the published version of this manuscript.

BMJ Open is an open access journal and the full, final, typeset and author-corrected version of record of the manuscript is available on our site with no access controls, subscription charges or pay-per-view fees (<http://bmjopen.bmj.com>).

If you have any questions on BMJ Open's open peer review process please email [info.bmjopen@bmj.com](mailto:info.bmjopen@bmj.com)

# BMJ Open

## **Ethnicity and COVID-19 outcomes among healthcare workers in the United Kingdom: UK-REACH ethico-legal research, qualitative research on healthcare workers' experiences, and stakeholder engagement protocol**

|                               |                                                                                                                                                                                                                                                                                                                                                                                                                                                                                                                                                                                                                                                                                                                                                                                                                                                                                 |
|-------------------------------|---------------------------------------------------------------------------------------------------------------------------------------------------------------------------------------------------------------------------------------------------------------------------------------------------------------------------------------------------------------------------------------------------------------------------------------------------------------------------------------------------------------------------------------------------------------------------------------------------------------------------------------------------------------------------------------------------------------------------------------------------------------------------------------------------------------------------------------------------------------------------------|
| Journal:                      | <i>BMJ Open</i>                                                                                                                                                                                                                                                                                                                                                                                                                                                                                                                                                                                                                                                                                                                                                                                                                                                                 |
| Manuscript ID                 | bmjopen-2021-049611                                                                                                                                                                                                                                                                                                                                                                                                                                                                                                                                                                                                                                                                                                                                                                                                                                                             |
| Article Type:                 | Protocol                                                                                                                                                                                                                                                                                                                                                                                                                                                                                                                                                                                                                                                                                                                                                                                                                                                                        |
| Date Submitted by the Author: | 27-Jan-2021                                                                                                                                                                                                                                                                                                                                                                                                                                                                                                                                                                                                                                                                                                                                                                                                                                                                     |
| Complete List of Authors:     | Gogoi, Mayuri; University of Leicester, Respiratory Sciences<br>Reed-Berendt, Ruby; The University of Edinburgh, School of Law<br>Al-Oraibi, Amani; University of Nottingham, Division of Epidemiology and Public Health, School of Medicine<br>Hassan, Osama; University of Nottingham, Division of Epidemiology and Public Health, School of Medicine<br>Wobi, Fatimah; University of Leicester, Respiratory Sciences<br>Gupta, Amit; Oxford University Hospitals NHS Foundation Trust<br>Abubakar, Ibrahim; UCL Institute for Global Health<br>Dove, Edward; The University of Edinburgh, School of Law<br>Nellums, Laura ; University of Nottingham, Division of Epidemiology and Public Health, School of Medicine<br>Pareek, Manish; University of Leicester, Respiratory Sciences; University Hospitals of Leicester NHS Trust, Department of Infection and HIV Medicine |
| Keywords:                     | COVID-19, MEDICAL ETHICS, MEDICAL LAW, QUALITATIVE RESEARCH                                                                                                                                                                                                                                                                                                                                                                                                                                                                                                                                                                                                                                                                                                                                                                                                                     |
|                               |                                                                                                                                                                                                                                                                                                                                                                                                                                                                                                                                                                                                                                                                                                                                                                                                                                                                                 |

SCHOLARONE™  
Manuscripts

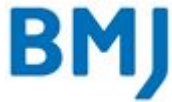

I, the Submitting Author has the right to grant and does grant on behalf of all authors of the Work (as defined in the below author licence), an exclusive licence and/or a non-exclusive licence for contributions from authors who are: i) UK Crown employees; ii) where BMJ has agreed a CC-BY licence shall apply, and/or iii) in accordance with the terms applicable for US Federal Government officers or employees acting as part of their official duties; on a worldwide, perpetual, irrevocable, royalty-free basis to BMJ Publishing Group Ltd ("BMJ") its licensees and where the relevant Journal is co-owned by BMJ to the co-owners of the Journal, to publish the Work in this journal and any other BMJ products and to exploit all rights, as set out in our [licence](#).

The Submitting Author accepts and understands that any supply made under these terms is made by BMJ to the Submitting Author unless you are acting as an employee on behalf of your employer or a postgraduate student of an affiliated institution which is paying any applicable article publishing charge ("APC") for Open Access articles. Where the Submitting Author wishes to make the Work available on an Open Access basis (and intends to pay the relevant APC), the terms of reuse of such Open Access shall be governed by a Creative Commons licence – details of these licences and which [Creative Commons](#) licence will apply to this Work are set out in our licence referred to above.

Other than as permitted in any relevant BMJ Author's Self Archiving Policies, I confirm this Work has not been accepted for publication elsewhere, is not being considered for publication elsewhere and does not duplicate material already published. I confirm all authors consent to publication of this Work and authorise the granting of this licence.

1  
2  
3 **Ethnicity and COVID-19 outcomes among healthcare workers in the United Kingdom:**  
4  
5 **UK-REACH ethico-legal research, qualitative research on healthcare workers'**  
6  
7 **experiences, and stakeholder engagement protocol**  
8  
9

10  
11  
12 Mayuri Gogoi<sup>1\*</sup>, Ruby Reed-Berendt<sup>2\*</sup>, Amani Al-Oraibi<sup>3</sup>, Osama Hassan<sup>3</sup>, Fatimah Wobi<sup>1</sup>,  
13  
14 Amit Gupta<sup>4</sup>, Ibrahim Abubakar<sup>5</sup>, Edward S Dove<sup>2</sup>, Laura B Nellums<sup>3</sup>, Manish Pareek<sup>1,6,7,#</sup>

15  
16  
17 On behalf of the UK-REACH Collaborative Group (see appendix 1 for full list)  
18

19  
20 \*Joint first authors  
21

22  
23 #Senior and corresponding author  
24  
25

26  
27  
28  
29 <sup>1</sup>Department of Respiratory Sciences, University of Leicester, UK  
30

31  
32 <sup>2</sup>School of Law, University of Edinburgh, Edinburgh, UK  
33

34  
35 <sup>3</sup>Division of Epidemiology and Public Health, School of Medicine, University of  
36  
37 Nottingham, Nottingham, UK  
38

39  
40 <sup>4</sup>Oxford University Hospitals NHS Foundation Trust, UK  
41

42  
43 <sup>5</sup>UCL Institute for Global Health, London, UK  
44

45  
46 <sup>6</sup>Department of Infection and HIV Medicine, University Hospitals of Leicester NHS  
47  
48 Trust, Leicester, UK  
49

50  
51 <sup>7</sup> NIHR Leicester BRC, Leicester, UK  
52

53  
54 **Corresponding author:**  
55

56  
57 Dr. Manish Pareek  
58

59  
60 Department of Respiratory Sciences,

1  
2  
3  
4  
5  
6  
7  
8  
9  
10  
11  
12  
13  
14  
15  
16  
17  
18  
19  
20  
21  
22  
23  
24  
25  
26  
27  
28  
29  
30  
31  
32  
33  
34  
35  
36  
37  
38  
39  
40  
41  
42  
43  
44  
45  
46  
47  
48  
49  
50  
51  
52  
53  
54  
55  
56  
57  
58  
59  
60

University of Leicester, UK

Email: [mp426@le.ac.uk](mailto:mp426@le.ac.uk)

For peer review only

## ABSTRACT

**Introduction:** As the world continues to grapple with the COVID-19 pandemic, emerging evidence suggests that individuals from ethnic minority backgrounds may be disproportionately affected. The UK-REACH project has been initiated to understand ethnic differentials in COVID-19 outcomes among healthcare workers (HCWs) in the United Kingdom (UK) through five inter-linked work packages. The ethico-legal work package (Work Package 3) aims to understand and address legal, ethical and acceptability issues around big data research; the healthcare workers' experiences work package (Work Package 4) is a qualitative study exploring healthcare workers' experiences during COVID-19 and; the stakeholder engagement work package (Work Package 5) aims to provide feedback and support with the formulation and dissemination of the project recommendations.

**Methods and Analysis:** Work Package 3 has two different research strands: (a) desk-based doctrinal research; and (b) empirical qualitative research with key opinion leaders. For the empirical research, in-depth interviews will be conducted digitally and recorded with participants' permission. Recordings will be transcribed, coded and analysed using thematic analysis. In Work Package 4, online in-depth interviews and focus groups will be conducted with approximately 150 HCWs, from across the UK, and these will be recorded with participants' consent. The recordings will be transcribed, coded and data will be analysed using thematic analysis. Work Package 5 will achieve its objectives through regular group meetings and in-group discussions.

**Ethics and Dissemination:** Ethical approval has been received from the London - Brighton & Sussex Research Ethics Committee of the Health Research Authority (Ref No. 20/HRA/4718).

1  
2  
3 Results of the study will be published in open access journals, and disseminated through  
4  
5 conference presentations, project website, stakeholder organisations, media and scientific  
6  
7 advisory groups.  
8  
9

10  
11  
12 **Registration Details:** Registered with the International Standard Randomised Controlled  
13  
14 Trial Number registry (ISRCTN11811602).  
15  
16  
17  
18  
19  
20  
21  
22  
23  
24  
25  
26  
27  
28  
29  
30  
31  
32  
33  
34  
35  
36  
37  
38  
39  
40  
41  
42  
43  
44  
45  
46  
47  
48  
49  
50  
51  
52  
53  
54  
55  
56  
57  
58  
59  
60

For peer review only

## STRENGTHS AND LIMITATIONS OF THIS STUDY

- The dual approach of doctrinal and empirical research (Work Package 3) on the use of personal data by UK-REACH will give a comprehensive understanding of the ethical and legal implications of the study, and perceptions about its use of data.
- Qualitative research with healthcare workers in the UK on their experiences during the COVID-19 pandemic (Work Package 4) will provide insight into personal behaviour, perceptions of risk and coping mechanisms adopted both inside and outside of the work environment.
- Stakeholder engagement (Work Package 5) from professional regulatory bodies and staff groups is embedded within the UK-REACH study to provide feedback on project activities and support with project recommendations.
- The target participants (key opinion leaders) for Work Package 3 empirical study will likely come from predominantly White backgrounds which may limit the breadth of views obtained in interviews. This limitation will be mitigated by active recruitment of opinion leaders from a wide variety of ethnic backgrounds and active interaction with Work Package 5.
- Due to the pandemic restrictions, interviews and focus group discussions will be conducted via online methods as a substitute for face-to-face meetings, posing practical and technological challenges for dynamic interaction with participants.



## INTRODUCTION

Since the start of the COVID-19 pandemic in December 2019 in China, the Severe Acute Respiratory Syndrome Coronavirus-2 (SARS-CoV-2) has spread rapidly to almost all parts of the world, infecting officially and to date, more than 100 million people and claiming around two million lives (1). As the world continues to grapple with this novel virus, there is emerging evidence that ethnicity may be an important risk factor in COVID-19 infection, disease, and mortality (2). In the United Kingdom (UK), people from ethnic minority communities have been found to be disproportionately affected by COVID-19 (3-7). Ethnic differences in COVID-19 outcomes have become significant not only because of the grave medical and clinical concerns, but also due to accompanying issues of marginalisation and health inequities affecting these communities, which predate the pandemic (8). Urgent calls had, therefore, been made to mainstream ethnicity into COVID-19 research, albeit with caution to adopt a holistic view of ethnicity (9, 10). While research on ethnicity and COVID-19 has since progressed (11), its interplay with other crucial risk factors, such as occupation, remains scantily explored.

Occupational risk has been identified as a contributing factor in COVID-19 morbidity and mortality, with healthcare workers (HCWs) accounting for a large proportion of the total caseload (12). The increased burden of SARS-CoV-2 infection on HCWs and their families, particularly those from an ethnic minority background, has been reported, raising further concerns about the protection of those most at risk (13-16). Potential explanations for increased risk among HCWs have mostly been attributed to patient-facing roles, lack of Personal Protective Equipment (PPE), long working hours, and even lack of training (17). While these reasons may offer partial explanation, they fail to explicate the high rates of infection and deaths among ethnic minority HCWs. In their analysis of deaths from COVID-19 among National Health Service (NHS) workers in the UK, Cook et al., point out that while ethnic

1  
2  
3 minority workers constitute about 21% of the NHS workforce, they have accounted for nearly  
4  
5 63% of the total deaths (16). These differential outcomes make an urgent case for exploring if,  
6  
7 how, and why ethnicity affects COVID-19 diagnosis and clinical outcomes in HCWs, with  
8  
9 special reference to HCWs from ethnic minority groups.  
10  
11

12  
13 The United Kingdom Research study into Ethnicity And COVID-19 outcomes in Healthcare  
14  
15 workers (UK-REACH), led by the University of Leicester, has been initiated to fill this gap,  
16  
17 and will rapidly examine differences in COVID-19 diagnosis, clinical outcomes, professional  
18  
19 practices, and physical and mental well-being among HCWs from different ethnicities through  
20  
21 five inter-linked work packages. In this article, we describe the doctrinal, qualitative and  
22  
23 stakeholder engagement protocol covering Work Packages 3-5 of the project, which will  
24  
25 explore questions of ethics, law, risk perception and behaviours of HCWs in relation to  
26  
27 COVID-19.  
28  
29

### 30 31 32 **UK-REACH (Work Packages 3-5) Objectives:** 33

34  
35 The objectives of Work Packages 3-5 are to:  
36  
37

- 38 1. Undertake research to understand and address legal, ethical, and social acceptability  
39 issues around data protection, privacy and information governance associated with the  
40 linkage of professionals' registration data and healthcare data (Work Package 3).  
41  
42
- 43 2. Undertake qualitative interviews and focus groups with HCWs to examine experiences,  
44 knowledge, behaviour, and risk perceptions pertaining to COVID-19 (Work Package  
45 4); and  
46  
47
- 48 3. Develop a multi-professional, national stakeholder group to inform the conduct of the  
49 research, facilitate rapid dissemination and translation of the research findings into  
50 policy (Work Package 5).  
51  
52  
53  
54  
55  
56  
57  
58

### 59 **METHODS** 60

## **Ethical and Legal Work Package (WP3)**

### ***Study Design***

Research involving large datasets containing personal and health information raises legal, ethical, and social issues surrounding the processing of such sensitive data, even when then the data are putatively anonymised. Understanding healthcare workers' concerns regarding trust, engagement, risk perception, barriers to participation, and confidentiality are paramount for a project like UK-REACH to succeed and be conducted in a way that both respects participants' rights and interests, and also holds ethics and law at the forefront of each research activity. To do so, the legal and ethical work package will undertake two different strands of research. First, we will undertake desk-based doctrinal research to identify the relevant legal and ethical issues and provide a policy report with ongoing recommendations for implementation within the project. Second, we will conduct empirical qualitative research with key opinion leaders to explore their views on the ethical and legal implications of large dataset analyses/cohort studies, such as risks of re-identification and identifying core principles of information governance in the context of sensitive data and healthcare worker datasets. We explore each of these research strands in more detail below.

### ***Desk-Based Research***

The legal and ethical work package will commence with a comprehensive literature and doctrinal review to identify the legal framework and ethical issues pertinent to UK-REACH. This will focus on concerns surrounding privacy, data protection, and human rights, and how to ensure an ethical approach for UK-REACH, particularly in the context of linking data concerning healthcare professionals' employment, registration and health. Key issues we will consider include, the limits of anonymisation, the risks of re-identification, particular ethical

1  
2  
3 concerns arising from the use of sensitive data concerning ethnicity, and what appropriate  
4 safeguards can be considered.  
5  
6

7  
8 From this, a comprehensive policy report will be formulated to outline the key legal and ethical  
9 issues and provide recommendations for UK-REACH, to be delivered in month 3 of the project.  
10  
11  
12

### 13 ***Empirical Qualitative Research***

#### 14 *Study Population*

15  
16  
17 The proposed qualitative research component in this work package will have key opinion  
18 leaders ( $\geq 16$  years of age) working in a healthcare and biomedical research, or in health-related  
19 organisations (such as regulatory bodies, Royal Colleges, trade unions). Approximately 15-20  
20 participants will be purposively selected and recruited through gatekeepers.  
21  
22  
23  
24  
25  
26  
27  
28

#### 29 *Data Collection*

30  
31  
32 Data will be collected using a semi-structured topic guide, which has been developed by ED in  
33 consultation with other investigators and the PPI group in UK-REACH. The topic guide will  
34 include key areas of inquiry, such as participants' past experiences of research or knowledge  
35 of research processes, real or perceived barriers to research participation, views on current  
36 safeguards in law, policy and regulation around participants' rights and interests, exploring  
37 how ethnicity and race may influence risks and stigmatisation in research, or perceptions of the  
38 same and finally to gather views on protection measures that can or should be put in place by  
39 law or policy to adequately protect research participants. Additionally, for purposes of  
40 describing the cohort, basic demographic information such as age, gender, job role, and  
41 geographic location will be collected using a short demographic data template.  
42  
43  
44  
45  
46  
47  
48  
49  
50  
51  
52  
53  
54  
55

56 Interviews will be conducted by a member of the research team via Skype, Microsoft Teams  
57 (or similar videoconference platform), or via telephone, depending on the availability,  
58  
59  
60

1  
2  
3 preference, COVID-19 limitations, and/or work requirements of the participant. The interviews  
4  
5 are likely to last between 45-60 minutes. Interviews will be recorded through the relevant  
6  
7 platform software where possible (e.g. using the recording feature in Teams) or on encrypted  
8  
9 digital dictaphones, always with participants' express written permission. If required,  
10  
11 interviews will be conducted with interpreters using simultaneous translation where preferred  
12  
13 by the participant. If preferred, participants may also write their responses to the questions in  
14  
15 the topic guide, rather than orally. Where interviews are conducted orally, data will be  
16  
17 transcribed and then anonymised prior to data analysis. Where data are collected with  
18  
19 interpreters, only the English language data will be transcribed and analysed. Anonymised  
20  
21 written accounts and field notes will also be transcribed into Word documents for analysis.  
22  
23  
24  
25

### 26 27 *Analysis Plan*

28  
29 Digital files of the recorded interviews will be immediately uploaded securely and transcribed  
30  
31 in intelligent verbatim by a transcription specialist company. The transcripts will be  
32  
33 anonymised by removing all identifying information that enabled indirect or inferential  
34  
35 identification. Once transcribed, we will compare the transcription with the recording to ensure  
36  
37 accuracy.  
38  
39  
40  
41

42 The data from the interviews will be coded using qualitative thematic analysis. The process  
43  
44 will consist of generating initial codes by comparing each of the transcripts. Coding is expected  
45  
46 to be done manually and in multiple stages. We will adopt an inductive, data-driven approach  
47  
48 and will begin with 'open coding', i.e. reading each transcript (word by word and line by line).  
49  
50 During the coding process, we will take notes in a memo-style format by writing down words  
51  
52 and thoughts considered to be of use during the data analysis and serve as a reference for  
53  
54 potential coding ideas. After completion of the open coding, initial codes will be constructed  
55  
56 based on what emerged from the text, and we will proceed to code the remaining transcripts  
57  
58  
59  
60

1  
2  
3 with those codes. When we encounter data that do not fit into an existing code, we will add  
4 new codes. We will then group the similar codes and place them into categories. These  
5 categories will be reorganised into broader, higher order categories, then grouped, revised, and  
6 refined, and finally checked to determine whether the categories are mutually exclusive. At this  
7 point, we will form final categories, identifying subthemes both within and across the  
8 categories, which will then be organised into main themes.  
9  
10  
11  
12  
13  
14  
15  
16

## 17 **Qualitative Research on Healthcare Workers' Experiences Work Package (WP4)**

### 18 ***Study Design***

19  
20  
21 In Work Package 4, we will undertake qualitative research with HCWs to understand their  
22 experiences during the COVID-19 pandemic. We will engage with clinical and ancillary staff  
23 from ethnic minority and White backgrounds working in healthcare settings (e.g. frontline  
24 healthcare workers, ancillary staff working in hospitals, community practitioners) to gain  
25 insight into their perceptions around risk factors, support, coping mechanisms, and their mental  
26 and physical health during the pandemic in order to inform response strategies to reduce  
27 COVID-19 morbidity and mortality in these individuals. We will conduct semi-structured  
28 interviews and focus groups, which will enable in-depth explorations of individual participants'  
29 experiences and perspectives (18), and also facilitate discussion between participants to explore  
30 both shared and differing experiences and perspectives (19, 20).  
31  
32  
33  
34  
35  
36  
37  
38  
39  
40  
41  
42  
43  
44  
45  
46

### 47 ***Study Population***

48  
49  
50 Participants in Work Package 4 will consist of adult individuals ( $\geq 16$  years of age) with  
51 capacity to consent, from ethnic minority and White backgrounds with experience of working  
52 in healthcare settings during COVID-19, including both clinical and ancillary staff. We will  
53 recruit a purposive sample and will aim for theoretical saturation, including approximately 50  
54 in-depth semi-structured interviews and focus groups with a total of approximately 100  
55  
56  
57  
58  
59  
60

1  
2  
3 participants. Saturation describes the point at which no new data or insights are being gained  
4  
5 from interviews or focus groups (21), and so, it becomes methodologically unnecessary to  
6  
7 continue recruiting new individuals. In total, we aim to recruit approximately 150 participants  
8  
9 from different ethnicities, genders, job roles, hospital trusts and health boards, and UK regions  
10  
11 to obtain a diverse sample.  
12  
13

### 14 15 ***Data Collection*** 16

17  
18 We will recruit participants through collaborators/partners, community organisations, and NHS  
19  
20 organisations throughout the country. We will promote our research through posters, which  
21  
22 will be advertised on site and digitally (e.g. online, by e-mail, and social media). Interested  
23  
24 individuals will be able to contact the research team directly via the information provided on  
25  
26 the poster. We will also work with gatekeepers in our partner and NHS organisations, who will  
27  
28 send out communications regarding UK-REACH Work Package 4 to their networks or staff to  
29  
30 facilitate recruitment. Additionally, a subset of cohort participants from Work Package 2 who  
31  
32 have given their consent to be contacted for further research will be invited to participate in the  
33  
34 interviews/focus groups.  
35  
36  
37

38  
39 Semi-structured interviews and focus groups will be conducted by the research team informed  
40  
41 by a topic guide. Key topics included in this guide are: exploring participants' experiences of  
42  
43 working during COVID-19; their fears and concerns at work and outside of work; perceived  
44  
45 risk factors; challenges faced in accessing information to keep themselves safe; concerns  
46  
47 around stigma, discrimination and racism; and identifying facilitators and coping mechanisms.  
48  
49 To accommodate multiple participants, approximately 1.5 hours will be allocated to the focus  
50  
51 groups compared to the 45-60 minutes for the one-to-one interviews. Following their  
52  
53 participation, a token payment will be given to HCWs in recognition of their contribution to  
54  
55 the research.  
56  
57  
58  
59  
60

1  
2  
3 The topic guide will be the same when engaging healthcare staff through focus groups or one-  
4 to-one interviews. As in Work Package 3, we will also collect basic demographic information  
5 about the participants using a short demographic data template. Interviews and focus groups  
6 will take place in a secure, virtual environment (e.g. Skype, Microsoft Teams) or via telephone  
7 at a time that is convenient to the participants. Where prior consent is given, interviews and  
8 focus groups will be recorded through the relevant software platform (e.g. using the recording  
9 feature in Microsoft Teams). Interpreters may also be used if requested by participants. Focus  
10 groups may also be conducted asynchronously using online platforms (e.g. focusgroupit.com),  
11 which have been used by other researchers and found to be helpful (22). Interview and focus  
12 group recordings will be transcribed by professional transcribers and pseudonymised before  
13 start of analysis. The transcriptions will be supplemented with notes taken by the researchers  
14 during the interviews and focus groups.

### 31 *Analysis Plan*

32  
33 Interview transcripts will be analysed using thematic analysis. Thematic analysis involves  
34 identifying themes or patterns in the data, lending coherence and order to it (23). Following  
35 Braun and Clarke's six stages of thematic analysis, we will read and re-read the transcripts to  
36 build familiarity with the data, generate initial codes to develop a coding framework, collate  
37 codes into broad themes, review the themes, define and name themes and finally write up the  
38 themes in a report form (24). We will primarily adopt an open inductive approach to develop  
39 codes out of our data, but codes may also be developed from existing literature and/or  
40 previously conducted research (23). Coding of data will be performed by the research team  
41 using NVivo software, and three/four different members of the research team will triangulate  
42 the coding process for credibility and rigour. Coding and theme development will be carried  
43 out until data saturation is reached and no new themes are emerging.



## Stakeholder Engagement Work Package (WP5)

The rich diversity of the UK-REACH research will be complemented by a robust stakeholder involvement and engagement strategy, which has been in-built into the project (WP5) and conforms to the principles of (i) being receptive of public views and opinions, (ii) collaborating and co-creating with the public, and (iii) involving the public in wider dissemination of results.

Within this work package, a Stakeholder Group (UK-REACH STAG) has been created to provide feedback and insights, and support in the formulation and propagation of the project recommendations. The group has membership from a range of partner stakeholder organisations such as the General Medical Council, Nursing and Midwifery Council, Filipino Nurses Association-UK (FNAUK), and Association of Pakistani Physicians in Northern Europe (APPNE). The group will meet virtually, once a month, until the end of the project, and will be governed by a set of terms of reference (TOR). Group meetings will be chaired by a nominated healthcare worker Chairperson/Deputy Chairperson, and a member of the research team will help with the coordination. Common email forums may also be created for the group members to share their views, opinions, and feedback amongst each other outside of the periodic meetings. Progress with the delivery of other work packages, and where needed input from a stakeholder perspective is sought through these meetings. The stakeholder group's primary approach is through informal consensus building during the monthly meetings. Formal consensus approaches such as Delphi may be used if a more challenging decision need arises during the implementation of the project or for the purpose of optimising dissemination.

Views and opinions expressed by the group members will be aggregated, and individual names will not appear in any of the published documents. Meeting minutes will only be shared with the respective group members and on a need-to-know basis with members of the research team.

The UK-REACH STAG will also provide support in the dissemination of the project recommendations.

## **PATIENT AND PUBLIC INVOLVEMENT**

Public involvement has been a central tenet in the UK-REACH project since its early stages. The project was developed in consultation and collaboration with national stakeholders including the General Medical Council, Nursing and Midwifery Council, Royal Colleges and ethnic minority HCW associations like British Association of Physicians of Indian Origin (BAPIO). The public involvement and engagement component has been further streamlined into the project with the creation of the Professional Expert Panel (PEP) comprising of healthcare professionals in various roles and from different ethnic backgrounds. The group members provide unique insight - relating to their professions and ethnic groups by virtue of their lived experiences - to certain aspects of the project. The PEP meets virtually and has provided inputs on the participant recruitment strategies for the different work packages, as well as questionnaire for the cohort study, topic guides for WP3 and WP4, and other study-related documents (e.g., text within participant-facing items). We will continue to consult the PEP on other matters, such as data collection, analysis, reporting and even dissemination, as the project progresses.

## **ETHICS AND DISSEMINATION**

### ***Informed Consent***

Prior to focus groups and interviews, potential participants will be given participant information sheets (PIS), which will detail the nature of the research, objectives, and any risks involved with participation. In light of COVID-19 constraints regarding face-to-face interaction, consent will be sought digitally (i.e., via a secure internet portal) from the participants and a downloadable version of the completed form will be available to participants for their record. The right to decline to participate, and to withdraw consent at any stage of the research, will be explicitly stated on both the PIS and in discussion with potential participants.

1  
2  
3 It will be explicitly stated that their signing of the consent form at no point supersedes their  
4 right to withdraw from the study. For potential participants who seek information in languages  
5 other than English, prior to them giving informed consent, efforts will be made, wherever  
6 possible, to orally explain all study information (including information sheets and consent  
7 forms) with support from an interpreter. The opportunity will also be given before every  
8 interview and focus group for participants to ask any questions about the scope of the research,  
9 or their rights as participants throughout the consent process.  
10  
11  
12  
13  
14  
15  
16  
17  
18  
19

### ***Psychologically or emotionally distressing conversations***

20  
21  
22  
23 Whilst this study is low risk, particularly with respect to Work Packages 3-5, we recognise that  
24 exploring and discussing experiences around COVID-19 and ethnicity (including issues of  
25 stigmatisation, structural injustice or racism) could be distressing to participants. We aim to  
26 manage this risk through the consent process, clearly explaining to individuals what the study  
27 entails, and giving ample opportunities to question the process and decline to take part if  
28 individuals wish. We also aim to make the interview process as comfortable as possible, and  
29 ensure participants know they may stop, take a break, or decide to withdraw from the interview  
30 and/or study at any point. The interview will always proceed at the comfort and discretion of  
31 the participant.  
32  
33  
34  
35  
36  
37  
38  
39  
40  
41  
42  
43

### ***Confidentiality and data protection***

44  
45  
46  
47 We will inform participants that participation will be confidential, and any personal  
48 information collected will be anonymised. Interview transcripts relating to individuals will also  
49 be pseudonymised using a unique numerical and date reference as the means to identify  
50 individual data sets. Such a system will ensure the anonymity of the participants and allow  
51 identification of individual data sets should a participant wish to exercise their individual rights  
52 (such as access, rectification, or erasure). Individual data and transcripts will be held in secure  
53  
54  
55  
56  
57  
58  
59  
60

1  
2  
3 digital drives, and original recordings will be deleted after transcription. Access to the full data  
4 set will only be provided to the members of the research team. The only circumstance in which  
5 individual level data will be released is in the form of de-identified, anonymised excerpts within  
6 the final publication, which is a standard procedure in qualitative research of this type (25).  
7  
8 The excerpts will take the form of words, sentences, and phrases the participants have provided  
9 which exemplify the coding framework and themes generated through the analysis.  
10  
11  
12  
13  
14  
15  
16

### 17 ***Dissemination of Results and Recommendations***

18  
19  
20 We will ensure that the findings from the Work Packages are reported rapidly and published  
21 on our public facing website ([www.uk-reach.org](http://www.uk-reach.org)). We have also enlisted the support of our  
22 stakeholders in disseminating the findings and recommendations through their organisational  
23 websites, newsletters, internal communications, blogs, or social media channels like Twitter.  
24  
25 Following suggestions from our STAG members, we will also endeavour to make  
26 recommendations available in other languages such as Welsh, for greater uptake. In addition,  
27 we will make our findings available to the Scientific Advisory Group for Emergencies (SAGE)  
28 and other policymakers in a timely manner so that policy decisions can be made in near real-  
29 time. As a topic of immense public health significance, we will also endeavour to make our  
30 results available through print and electronic media. We will also publish the outputs of this  
31 research in peer-reviewed journals in line with the University of Leicester's Open Access  
32 publication policy to enable us to share the results widely with the academic community. We  
33 will also make presentations at relevant academic conferences as well as non-academic events  
34 organised by our collaborators.  
35  
36  
37  
38  
39  
40  
41  
42  
43  
44  
45  
46  
47  
48  
49  
50  
51

## 52 **DISCUSSION**

53  
54  
55  
56 UK-REACH, led by the University of Leicester, is one of the first studies in the world that sets  
57 out to understand why HCWs from minority ethnic backgrounds are disproportionately  
58  
59  
60

1  
2  
3 affected by COVID-19 as compared to their White counterparts. While emerging evidence  
4 from epidemiological studies are pointing to varied COVID-19 outcomes among different  
5 ethnic groups, not much is known about the reasons behind this variation. The qualitative Work  
6 Packages of the project, i.e., WPs 3 & 4, are expected to generate evidence which will be crucial  
7 in understanding some of the ethnicity-linked risk factors in COVID-19. The aim of the  
8 stakeholder engagement work package is to disseminate this evidence widely and in a timely  
9 manner. Additionally, our Ethico-legal Work Package will generate important guidance on  
10 ways to minimise risks associated with research participation, and best practices in protecting  
11 the rights and interests of participants. We aim to increase knowledge about access to support,  
12 and key coping mechanisms, which in turn will enable stakeholders to protect the mental and  
13 physical health of ethnic minority staff in healthcare settings. We appreciate the insights that  
14 stakeholders can bring into our project and have enlisted their support from early-on to  
15 maximise our reach and impact. It is the ultimate hope that through this project that we will  
16 gain clear insight into the differences in COVID-19 clinical outcomes, professional practices,  
17 and well-being among ethnic minority and White HCWs, in turn leading to a robust evidence  
18 basis for policymaking to improve the effects of COVID-19 on all HCWs across the UK.  
19  
20  
21  
22  
23  
24  
25  
26  
27  
28  
29  
30  
31  
32  
33  
34  
35  
36  
37  
38  
39

#### 40 **Author Contributors**

41  
42  
43 MP and ED conceived and designed WP3. LBN, MP, and AG conceptualised and designed  
44 WP4. IA and MP conceived and designed WP5. ED wrote the first draft of the WP3 protocol,  
45 LBN wrote the first draft of the WP4 protocol and MG wrote the first draft of the WP5 protocol.  
46 All authors were involved in writing, revising and approving the final manuscript.  
47  
48  
49  
50  
51  
52

#### 53 **Funding**

54  
55  
56 UK-REACH is supported by a grant (MR/V027549/1) from the MRC-UK Research and  
57 Innovation and the Department of Health and Social Care through the National Institute for  
58  
59  
60

1  
2  
3 Health Research (NIHR) rapid response panel to tackle COVID-19. Core funding was also  
4 provided by NIHR Biomedical Research Centres. MP is funded by a NIHR Development and  
5 Skills Enhancement Award and also acknowledges support from the NIHR Leicester BRC and  
6 NIHR ARC East Midlands. LBN is supported by the Academy of Medical Sciences  
7 (SBF005/1047). The views expressed in the publication are those of the author(s) and not  
8 necessarily those of the National Health Service (NHS), the NIHR or the Department of Health  
9 and Social Care.  
10  
11  
12  
13  
14  
15  
16  
17  
18  
19

20 This work is carried out with the support of BREATHE -The Health Data Research Hub for  
21 Respiratory Health [MC\_PC\_19004] funded through the UK Research and Innovation  
22 Industrial Strategy Challenge Fund and delivered through Health Data Research UK  
23  
24  
25  
26

### 27 **Competing Interest**

28  
29  
30 All authors have completed the ICMJE uniform disclosure form at  
31 [www.icmje.org/coi\\_disclosure.pdf](http://www.icmje.org/coi_disclosure.pdf) and declare: no support from any organisation for the  
32 submitted work. MP reports grants and personal fees from Gilead Sciences and personal fees  
33 from QIAGEN, outside the submitted work. IA reports personal fees from House of Lords,  
34 grants from Bill and Melinda Gates Foundation and grants from NIHR, outside the submitted  
35 work.  
36  
37  
38  
39  
40  
41  
42  
43  
44  
45  
46  
47  
48  
49  
50  
51  
52  
53  
54  
55  
56  
57  
58  
59  
60

## REFERENCES

1. COVID-19 dashboard by the Center for Systems Science and Engineering (CSSE) at Johns Hopkins University (JHU) [Internet]. Johns Hopkins University (JHU). [Accessed 26 January 2021]. Available from: <https://coronavirus.jhu.edu/map.html>
2. Pan D, Sze S, Minhas JS, Bangash MN, Pareek N, Divall P, et al. The impact of ethnicity on clinical outcomes in COVID-19: A systematic review. *EClinicalMedicine*. 2020;23: 100404. Published online 2020 Jun 3. DOI: [10.1016/j.eclinm.2020.100404](https://doi.org/10.1016/j.eclinm.2020.100404)
3. (ONS) OfNS. Coronavirus (COVID-19) related deaths by ethnic group, England and Wales: 2 March 2020 to 10 April 2020. 2020. Available from: <https://www.ons.gov.uk/peoplepopulationandcommunity/birthsdeathsandmarriages/deaths/articles/coronavirusrelateddeathsbyethnicgroupenglandandwales/2march2020to10april2020>
4. Aldridge RW, Lewer D, Katikireddi SV *et al*. Black, Asian and Minority Ethnic groups in England are at increased risk of death from COVID-19: indirect standardisation of NHS mortality data [version 2; peer review: 3 approved]. *Wellcome Open Res* 2020, 5:88. DOI: <https://doi.org/10.12688/wellcomeopenres.15922.2>.
5. Martin CA, Jenkins DR, Minhas JS, Gray LJ, Tang J, Williams C, et al. Socio-demographic heterogeneity in the prevalence of COVID-19 during lockdown is associated with ethnicity and household size: Results from an observational cohort study. *EClinicalMedicine*. 2020;25. DOI: [10.1016/j.eclinm.2020.100466](https://doi.org/10.1016/j.eclinm.2020.100466)
6. Harrison EM, Docherty AB, Barr B, Buchan I, Carson G, Drake TM, et al. Ethnicity and outcomes from COVID-19: the ISARIC CCP-UK prospective observational cohort study of hospitalised patients. 2020. Available from: <https://dx.doi.org/10.2139/ssrn.3618215>
7. Lassale C, Gaye B, Hamer M, Gale CR, Batty GD. Ethnic disparities in hospitalisation for COVID-19 in England: The role of socioeconomic factors, mental health, and inflammatory and pro-inflammatory factors in a community-based cohort study. *Brain, Behavior, and Immunity*. 2020;88:44-49. DOI: [doi: 10.1016/j.bbi.2020.05.074](https://doi.org/10.1016/j.bbi.2020.05.074)
8. Khunti K, Singh AK, Pareek M, Hanif W. Is ethnicity linked to incidence or outcomes of covid-19? *BMJ*. 2020;369:m1548. DOI: <https://doi.org/10.1136/bmj.m1548>
9. Pareek M, Bangash MN, Pareek N, Pan D, Sze S, Minhas JS, et al. Ethnicity and COVID-19: an urgent public health research priority. *The Lancet*. 2020;395(10234):1421-22. DOI: [10.1016/S0140-6736\(20\)30922-3](https://doi.org/10.1016/S0140-6736(20)30922-3)
10. Patel P, Hiam L, Sowemimo A, Devakumar D, McKee M. Ethnicity and covid-19. *BMJ*. 2020;369:m2282. DOI: <https://doi.org/10.1136/bmj.m2282>
11. Sze S, Pan D, Nevill CR, Gray LJ, Martin CA, Nazareth J, et al. Ethnicity and clinical outcomes in COVID-19: A systematic review and meta-analysis. *EClinicalMedicine*. Volumes 29-30, 2020, 100630, DOI: <https://doi.org/10.1016/j.eclinm.2020.100630>
12. Koh D. Occupational risks for COVID-19 infection. *Occup Med (Lond)*. 2020;70(1):3-5. DOI: [10.1093/occmed/kqaa036](https://doi.org/10.1093/occmed/kqaa036)
13. Chou R, Dana T, Buckley DI, Selph S, Fu R, Totten AM. Epidemiology of and Risk Factors for Coronavirus Infection in Health Care Workers. *Annals of Internal Medicine*. 2020;173(2):120-36. DOI: [10.7326/M20-1632](https://doi.org/10.7326/M20-1632)
14. Shah ASV, Wood R, Gribben C, Caldwell D, Bishop J, Weir A, et al. Risk of hospital admission with coronavirus disease 2019 in healthcare workers and their households: nationwide linkage cohort study. *BMJ*. 2020;371:m3582. DOI: <https://doi.org/10.1136/bmj.m3582>
15. Nguyen LH, Drew DA, Graham MS, Joshi AD, Guo C-G, Ma W, et al. Risk of COVID-19 among front-line health-care workers and the general community: a prospective cohort study. *The Lancet Public Health*. 2020;5(9):e475-e83. DOI: [https://doi.org/10.1016/S2468-2667\(20\)30164-X](https://doi.org/10.1016/S2468-2667(20)30164-X)
16. Cook T, Kursumovic E, Lennane S. Exclusive: deaths of NHS staff from covid-19 analysed. *Health Service Journal*. 2020;22 April. Available from: <https://www.hsj.co.uk/exclusive-deaths-of-nhs-staff-from-covid-19-analysed/7027471.article>

17. Karlsson U, Fraenkel C-J. Covid-19: risks to healthcare workers and their families. *BMJ*. 2020;371:m3944. DOI: [10.1136/bmj.m3944](https://doi.org/10.1136/bmj.m3944)
18. Wengraf T. Qualitative research interviewing: Biographic narrative and semi-structured methods: Sage; 2001.
19. Ochieng P. An analysis of the strengths and limitation of qualitative and quantitative research paradigms. *Problems of Education in the 21st Century*. 2009;13:13. Available from: <http://oaji.net/articles/2014/457-1393665925.pdf>
20. Leung F-H, Savithiri R. Spotlight on focus groups. *Can Fam Physician*. 2009;55(2):218-19.
21. Saunders B, Sim J, Kingstone T, Baker S, Waterfield J, Bartlam B, et al. Saturation in qualitative research: exploring its conceptualization and operationalization. *Qual Quant*. 2018;52(4):1893-907. DOI: [10.1007/s11135-017-0574-8](https://doi.org/10.1007/s11135-017-0574-8)
22. Oseni K, Dingley K, Hart P. Instant messaging and social networks: The advantages in online research methodology. *International Journal of Information and Education Technology*. 2018;8(1):56-62. DOI: <https://doi.org/10.18178/ijiet.2018.8.1.1012>
23. Boyatzis RE. Transforming qualitative information: Thematic analysis and code development: Sage; 1998.
24. Braun V, Clarke V. Using thematic analysis in psychology. *Qualitative Research in Psychology*. 2006;3(2):77-101. DOI: [10.1191/1478088706qp063oa](https://doi.org/10.1191/1478088706qp063oa)
25. Corden A, Sainsbury R. Using verbatim quotations in reporting qualitative social research: researchers' views. 2006. Available from: <https://www.york.ac.uk/inst/spru/pubs/pdf/verbquotresearch.pdf>



**Appendix 1**UK-REACH Collaborative Group Members

1. Manish Pareek
2. Laura Gray
3. Laura Nellums
4. Anna Guyatt
5. Catherine Johns
6. Chris McManus
7. Katherine Woolf
8. Ibrahim Akubakar
9. Amit Gupta
10. Keith Abrams
11. Martin Tobin
12. Louise Wain
13. Sue Carr
14. Edward Dove
15. Kamlesh Kunti
16. David Ford
17. Rob Free

# BMJ Open

## Ethnicity and COVID-19 outcomes among healthcare workers in the United Kingdom: UK-REACH ethico-legal research, qualitative research on healthcare workers' experiences, and stakeholder engagement protocol

|                                 |                                                                                                                                                                                                                                                                                                                                                                                                                                                                                                                                                                                                                                                                                                                                                                                                                                                                                 |
|---------------------------------|---------------------------------------------------------------------------------------------------------------------------------------------------------------------------------------------------------------------------------------------------------------------------------------------------------------------------------------------------------------------------------------------------------------------------------------------------------------------------------------------------------------------------------------------------------------------------------------------------------------------------------------------------------------------------------------------------------------------------------------------------------------------------------------------------------------------------------------------------------------------------------|
| Journal:                        | <i>BMJ Open</i>                                                                                                                                                                                                                                                                                                                                                                                                                                                                                                                                                                                                                                                                                                                                                                                                                                                                 |
| Manuscript ID                   | bmjopen-2021-049611.R1                                                                                                                                                                                                                                                                                                                                                                                                                                                                                                                                                                                                                                                                                                                                                                                                                                                          |
| Article Type:                   | Protocol                                                                                                                                                                                                                                                                                                                                                                                                                                                                                                                                                                                                                                                                                                                                                                                                                                                                        |
| Date Submitted by the Author:   | 14-Jun-2021                                                                                                                                                                                                                                                                                                                                                                                                                                                                                                                                                                                                                                                                                                                                                                                                                                                                     |
| Complete List of Authors:       | Gogoi, Mayuri; University of Leicester, Respiratory Sciences<br>Reed-Berendt, Ruby; The University of Edinburgh, School of Law<br>Al-Oraibi, Amani; University of Nottingham, Division of Epidemiology and Public Health, School of Medicine<br>Hassan, Osama; University of Nottingham, Division of Epidemiology and Public Health, School of Medicine<br>Wobi, Fatimah; University of Leicester, Respiratory Sciences<br>Gupta, Amit; Oxford University Hospitals NHS Foundation Trust<br>Abubakar, Ibrahim; UCL Institute for Global Health<br>Dove, Edward; The University of Edinburgh, School of Law<br>Nellums, Laura ; University of Nottingham, Division of Epidemiology and Public Health, School of Medicine<br>Pareek, Manish; University of Leicester, Respiratory Sciences; University Hospitals of Leicester NHS Trust, Department of Infection and HIV Medicine |
| <b>Primary Subject Heading</b>: | Public health                                                                                                                                                                                                                                                                                                                                                                                                                                                                                                                                                                                                                                                                                                                                                                                                                                                                   |
| Secondary Subject Heading:      | Ethics, Qualitative research                                                                                                                                                                                                                                                                                                                                                                                                                                                                                                                                                                                                                                                                                                                                                                                                                                                    |
| Keywords:                       | COVID-19, MEDICAL ETHICS, MEDICAL LAW, QUALITATIVE RESEARCH                                                                                                                                                                                                                                                                                                                                                                                                                                                                                                                                                                                                                                                                                                                                                                                                                     |
|                                 |                                                                                                                                                                                                                                                                                                                                                                                                                                                                                                                                                                                                                                                                                                                                                                                                                                                                                 |

SCHOLARONE™  
Manuscripts



I, the Submitting Author has the right to grant and does grant on behalf of all authors of the Work (as defined in the below author licence), an exclusive licence and/or a non-exclusive licence for contributions from authors who are: i) UK Crown employees; ii) where BMJ has agreed a CC-BY licence shall apply, and/or iii) in accordance with the terms applicable for US Federal Government officers or employees acting as part of their official duties; on a worldwide, perpetual, irrevocable, royalty-free basis to BMJ Publishing Group Ltd ("BMJ") its licensees and where the relevant Journal is co-owned by BMJ to the co-owners of the Journal, to publish the Work in this journal and any other BMJ products and to exploit all rights, as set out in our [licence](#).

The Submitting Author accepts and understands that any supply made under these terms is made by BMJ to the Submitting Author unless you are acting as an employee on behalf of your employer or a postgraduate student of an affiliated institution which is paying any applicable article publishing charge ("APC") for Open Access articles. Where the Submitting Author wishes to make the Work available on an Open Access basis (and intends to pay the relevant APC), the terms of reuse of such Open Access shall be governed by a Creative Commons licence – details of these licences and which [Creative Commons](#) licence will apply to this Work are set out in our licence referred to above.

Other than as permitted in any relevant BMJ Author's Self Archiving Policies, I confirm this Work has not been accepted for publication elsewhere, is not being considered for publication elsewhere and does not duplicate material already published. I confirm all authors consent to publication of this Work and authorise the granting of this licence.

1  
2  
3 **Ethnicity and COVID-19 outcomes among healthcare workers in the United Kingdom:**  
4  
5 **UK-REACH ethico-legal research, qualitative research on healthcare workers'**  
6  
7 **experiences, and stakeholder engagement protocol**  
8  
9

10  
11  
12 Mayuri Gogoi<sup>1\*</sup>, Ruby Reed-Berendt<sup>2\*</sup>, Amani Al-Oraibi<sup>3</sup>, Osama Hassan<sup>3</sup>, Fatimah Wobi<sup>1</sup>,  
13  
14 Amit Gupta<sup>4</sup>, Ibrahim Abubakar<sup>5</sup>, Edward S Dove<sup>2</sup>, Laura B Nellums<sup>3</sup>, Manish Pareek<sup>1,6,7,#</sup>

15  
16  
17 On behalf of the UK-REACH Collaborative Group<sup>§</sup>  
18

19  
20 \*Joint first authors  
21

22  
23 #Senior and corresponding author  
24  
25

26  
27  
28  
29 <sup>1</sup>Department of Respiratory Sciences, University of Leicester, UK  
30

31  
32 <sup>2</sup>School of Law, University of Edinburgh, Edinburgh, UK  
33

34  
35 <sup>3</sup>Division of Epidemiology and Public Health, School of Medicine, University of  
36  
37 Nottingham, Nottingham, UK  
38

39  
40 <sup>4</sup>Oxford University Hospitals NHS Foundation Trust, UK  
41

42  
43 <sup>5</sup>UCL Institute for Global Health, London, UK  
44

45  
46 <sup>6</sup>Department of Infection and HIV Medicine, University Hospitals of Leicester NHS  
47  
48 Trust, Leicester, UK  
49

50  
51 <sup>7</sup> NIHR Leicester BRC, Leicester, UK  
52

53  
54 **Corresponding author:**  
55

56  
57 Dr. Manish Pareek  
58

59  
60 Department of Respiratory Sciences,

1  
2  
3  
4  
5  
6  
7  
8  
9  
10  
11  
12  
13  
14  
15  
16  
17  
18  
19  
20  
21  
22  
23  
24  
25  
26  
27  
28  
29  
30  
31  
32  
33  
34  
35  
36  
37  
38  
39  
40  
41  
42  
43  
44  
45  
46  
47  
48  
49  
50  
51  
52  
53  
54  
55  
56  
57  
58  
59  
60

University of Leicester, UK

Email: [mp426@le.ac.uk](mailto:mp426@le.ac.uk)

For peer review only

## ABSTRACT

**Introduction:** As the world continues to grapple with the COVID-19 pandemic, emerging evidence suggests that individuals from ethnic minority backgrounds may be disproportionately affected. The UK-REACH project has been initiated to generate rapid evidence on whether and why ethnicity affects COVID-19 diagnosis and clinical outcomes in Health Care Workers (HCWs) in the United Kingdom (UK), through five inter-linked work packages/work streams, three of which form the basis of this protocol. The ethico-legal work (Work Package 3) aims to understand and address legal, ethical and acceptability issues around big data research; the healthcare workers' experiences study (Work Package 4) explores their work and personal experiences, perceptions of risk, support and coping mechanisms; the stakeholder engagement work (Work Package 5) aims to provide feedback and support with the formulation and dissemination of the project recommendations.

**Methods and Analysis:** Work Package 3 has two different research strands: (a) desk-based doctrinal research; and (b) empirical qualitative research with key opinion leaders. For the empirical research, in-depth interviews will be conducted digitally and recorded with participants' permission. Recordings will be transcribed, coded and analysed using thematic analysis. In Work Package 4, online in-depth interviews and focus groups will be conducted with approximately 150 HCWs, from across the UK, and these will be recorded with participants' consent. The recordings will be transcribed, coded and data will be analysed using thematic analysis. Work Package 5 will achieve its objectives through regular group meetings and in-group discussions.

1  
2  
3 **Ethics and Dissemination:** Ethical approval has been received from the London - Brighton &  
4  
5 Sussex Research Ethics Committee of the Health Research Authority (Ref No. 20/HRA/4718).  
6  
7 Results of the study will be published in open access journals, and disseminated through  
8  
9 conference presentations, project website, stakeholder organisations, media and scientific  
10  
11 advisory groups.  
12  
13  
14  
15  
16

17 **Registration Details:** International Standard Randomised Controlled Trial Number registry  
18  
19 (ISRCTN11811602).  
20  
21  
22  
23  
24  
25  
26  
27  
28  
29  
30  
31  
32  
33  
34  
35  
36  
37  
38  
39  
40  
41  
42  
43  
44  
45  
46  
47  
48  
49  
50  
51  
52  
53  
54  
55  
56  
57  
58  
59  
60

## STRENGTHS AND LIMITATIONS OF THIS STUDY

- Doctrinal and empirical research (Work Package 3) to understand ethical and legal implications in big data health research is novel to the UK-REACH study and has potential to inform policy and practice in the area.
- UK-REACH is the first comprehensive qualitative research (Work Package 4) with healthcare workers, particularly from ethnic minority backgrounds, in the UK exploring their experiences during the COVID-19 pandemic and perceptions of risk and coping mechanisms.
- The engagement of stakeholders (Work Package 5) in every stage of UK-REACH is exemplary and provides real-world relevance to the research and the findings.
- As the ethico-legal empirical research will recruit key opinion leaders (and not members of the wider population), the demographic diversity of the sample and the opinions gathered in interview may be limited by the characteristics of those in leadership positions in the field.
- Due to the pandemic restrictions, interviews and focus group discussions will be conducted via online methods as a substitute for face-to-face meetings, posing practical and technological challenges for dynamic interaction with participants.



## INTRODUCTION

Since the start of the COVID-19 pandemic in December 2019 in China, the Severe Acute Respiratory Syndrome Coronavirus-2 (SARS-CoV-2) has spread rapidly to almost all parts of the world, infecting officially and to date, more than 170 million people and claiming around 3.5 million lives (1). As the world continues to fight against this novel virus, there is emerging evidence that ethnicity may be an important risk factor in COVID-19 infection, disease, and mortality (2-4). In the United Kingdom (UK), people from ethnic minority communities have been found to be disproportionately affected by COVID-19 (5-9). Ethnic differences in COVID-19 outcomes have become significant not only because of the grave medical and clinical concerns, but also due to accompanying issues of marginalisation and health inequities affecting these communities, which predate the pandemic (10). Urgent calls had, therefore, been made to incorporate ethnicity into COVID-19 research, albeit with caution to adopt a holistic view of ethnicity (11, 12). While research on ethnicity and COVID-19 has since progressed (13, 14), its interplay with other crucial risk factors, such as occupation, remains scantily explored.

Occupational risk has been identified as a contributing factor in COVID-19 morbidity and mortality, with healthcare workers (HCWs) accounting for a large proportion of the total caseload (15). The increased burden of SARS-CoV-2 infection on HCWs and their families, particularly those from an ethnic minority background, has been reported, raising further concerns about the protection of those most at risk (16-19). Potential explanations for increased risk among HCWs have mostly been attributed to patient-facing roles, lack of Personal Protective Equipment (PPE), long working hours, and even lack of training (20). While these reasons may offer partial explanation, they fail to explicate the high rates of infection and deaths among ethnic minority HCWs. In their analysis of deaths from COVID-19 among National Health Service (NHS) workers in the UK, Cook et al., point out that while ethnic

1  
2  
3 minority workers constitute about 21% of the NHS workforce, they have accounted for nearly  
4  
5 63% of the total deaths (19). These differential outcomes make an urgent case for exploring if,  
6  
7 how, and why ethnicity affects COVID-19 diagnosis and clinical outcomes in HCWs, with  
8  
9 special reference to HCWs from ethnic minority groups.  
10  
11

12  
13 The United Kingdom Research study into Ethnicity And COVID-19 outcomes in Healthcare  
14  
15 workers (UK-REACH), led by the University of Leicester, has been initiated to fill this gap.  
16  
17 This study has been badged as an Urgent Public Health (UPH) study by the National Institute  
18  
19 of Health Research (NIHR), and will run until August 2021 to rapidly examine differences in  
20  
21 COVID-19 diagnosis, clinical outcomes, professional practices, and physical and mental well-  
22  
23 being among HCWs from different ethnicities through five inter-linked work packages (see  
24  
25 [www.uk-reach.org](http://www.uk-reach.org) for more details). Work Package 1 is an analysis of a linked dataset with  
26  
27 anonymised health data on COVID-19 outcomes, among clinical and ancillary HCWs. Work  
28  
29 Package 2 will establish a national longitudinal cohort of ethnic minority (with White ethnic  
30  
31 group as comparator) HCWs and ancillary staff to assess changes in their health outcomes,  
32  
33 social circumstances and professional roles over the course of the pandemic. In this article, we  
34  
35 describe the doctrinal, qualitative and stakeholder engagement protocol covering Work  
36  
37 Packages 3-5 of the project, which will explore questions of ethics, law, risk perception and  
38  
39 behaviours of HCWs in relation to COVID-19.  
40  
41  
42  
43  
44  
45

#### 46 **UK-REACH (Work Packages 3-5) Objectives:**

47  
48  
49 The objectives of Work Packages 3-5 are to:

- 50  
51  
52 1. Undertake research to understand and address legal, ethical, and social acceptability  
53  
54 issues around data protection, privacy and information governance associated with the  
55  
56 linkage of professionals' registration data and healthcare data (Work Package 3).  
57  
58  
59  
60

- 2
  - 3
  - 4
  - 5
  - 6
  - 7
  - 8
  - 9
  - 10
  - 11
  - 12
  - 13
  - 14
  - 15
  - 16
  - 17
  - 18
  - 19
  - 20
  - 21
  - 22
  - 23
  - 24
  - 25
  - 26
  - 27
  - 28
  - 29
  - 30
  - 31
  - 32
  - 33
  - 34
  - 35
  - 36
  - 37
  - 38
  - 39
  - 40
  - 41
  - 42
  - 43
  - 44
  - 45
  - 46
  - 47
  - 48
  - 49
  - 50
  - 51
  - 52
  - 53
  - 54
  - 55
  - 56
  - 57
  - 58
  - 59
  - 60
2. Undertake qualitative interviews and focus groups with HCWs to examine experiences, risk perceptions, coping and support and physical and mental well-being pertaining to COVID-19 (Work Package 4); and
  3. Develop a multi-professional, national stakeholder group to inform the conduct of the research, facilitate rapid dissemination and translation of the research findings into policy (Work Package 5).

## METHODS

### Ethical and Legal Work Package (WP3)

#### *Study Design*

Research involving large datasets containing personal and health information raises legal, ethical, and social issues surrounding the processing of such sensitive data, even when then the data are putatively anonymised. Understanding healthcare workers' concerns regarding trust, engagement, risk perception, barriers to participation, and confidentiality are paramount for a project like UK-REACH to succeed and be conducted in a way that both respects participants' rights and interests, and also holds ethics and law at the forefront of each research activity. To do so, we will undertake two different strands of research. First, we will undertake desk-based doctrinal research to identify the relevant legal and ethical issues and provide a policy report with ongoing recommendations for implementation within the project. Second, we will conduct empirical qualitative research with key opinion leaders to explore their views on the ethical and legal implications of large dataset analyses/cohort studies, such as risks of re-identification and identifying core principles of information governance in the context of sensitive data and healthcare worker datasets. We explore each of these research strands in more detail below.

#### *Desk-Based Research*

1  
2  
3 The ethico-legal work will commence with a comprehensive literature and doctrinal review  
4 based on consultation of relevant legal, regulatory, and policy-based documents (conducted in  
5 part through consultation of the Westlaw legal database and the legislation.gov.uk website), to  
6 identify the legal framework and ethical issues pertinent to UK-REACH. This will focus on  
7 concerns surrounding privacy, data protection, and human rights, and how to ensure an ethical  
8 approach for UK-REACH, particularly in the context of linking data concerning healthcare  
9 professionals' employment, registration and health. Key issues we will consider include, the  
10 limits of anonymisation, the risks of re-identification, particular ethical concerns arising from  
11 the use of sensitive data concerning ethnicity, and what appropriate safeguards can be  
12 considered.  
13  
14  
15  
16  
17  
18  
19  
20  
21  
22  
23  
24  
25

26  
27 From this, a comprehensive policy report will be formulated to outline the key legal and ethical  
28 issues and provide recommendations for UK-REACH, to be delivered in month 3 of the project.  
29  
30  
31

### 32 ***Empirical Qualitative Research***

#### 33 *Study Population*

34  
35 The proposed empirical qualitative research will have key opinion leaders ( $\geq 16$  years of age)  
36 working in a healthcare and biomedical research, or in health-related organisations (such as  
37 regulatory bodies, Royal Colleges, trade unions). Approximately 15-20 participants will be  
38 purposively selected and recruited through gatekeepers, members of the UK-REACH research  
39 team, stakeholder group and snowballing.  
40  
41  
42  
43  
44  
45  
46  
47  
48  
49

#### 50 *Data Collection*

51  
52 Data will be collected using a semi-structured topic guide, which has been developed by ED in  
53 consultation with other investigators and the Professional Expert Panel (PEP), which is the PPI  
54 group in UK-REACH. The topic guide will include key areas of inquiry, such as participants'  
55 past experiences of research or knowledge of research processes, real or perceived barriers to  
56  
57  
58  
59  
60

1  
2  
3 research participation, views on current safeguards in law, policy and regulation around  
4 participants' rights and interests, exploring how ethnicity and race may influence risks and  
5 stigmatisation in research, or perceptions of the same and finally to gather views on protection  
6 measures that can or should be put in place by law or policy to adequately protect research  
7 participants. Additionally, for purposes of describing the cohort, basic demographic  
8 information such as age, gender, job role, and geographic location will be collected using a  
9 short demographic data template.

10  
11 Interviews will be conducted by a member of the research team via Microsoft Teams, or via  
12 telephone, depending on the availability, preference, COVID-19 limitations, and/or work  
13 requirements of the participant. The interviews are likely to last between 45-60 minutes.  
14 Interviews will be recorded through the relevant platform software (e.g. using the recording  
15 feature in Teams) or on encrypted digital dictaphones, always with participants' express written  
16 permission. As interviews are conducted orally, data will be transcribed and then anonymised  
17 prior to data analysis.

### 18 19 20 21 22 23 24 25 26 27 28 29 30 31 32 33 34 35 36 37 *Analysis Plan*

38  
39 Digital files of the recorded interviews will be immediately uploaded securely and transcribed  
40 in intelligent verbatim by a transcription specialist company. The transcripts will be  
41 anonymised by removing all identifying information that enable indirect or inferential  
42 identification. Once transcribed, we will compare the transcription with the recording to ensure  
43 accuracy.

44  
45  
46  
47  
48  
49  
50  
51  
52 The data from the interviews will be coded using qualitative thematic analysis. The process  
53 will consist of generating initial codes by comparing each of the transcripts. Coding is expected  
54 to be done manually and in multiple stages. We will adopt an inductive, data-driven approach  
55 and will begin with 'open coding', i.e. reading each transcript (word by word and line by line).

1  
2  
3 During the coding process, we will take notes in a memo-style format by writing down words  
4 and thoughts considered to be of use during the data analysis and serve as a reference for  
5  
6 potential coding ideas. After completion of the open coding, initial codes will be constructed  
7  
8 based on what emerged from the text, and we will proceed to code the remaining transcripts  
9  
10 with those codes. When we encounter data that do not fit into an existing code, we will add  
11  
12 new codes. We will then group the similar codes and place them into categories. These  
13  
14 categories will be reorganised into broader, higher order categories, then grouped, revised, and  
15  
16 refined, and finally checked to determine whether the categories are mutually exclusive. At this  
17  
18 point, we will form final categories, identifying subthemes both within and across the  
19  
20 categories, which will then be organised into main themes.  
21  
22  
23  
24  
25  
26

## 27 **Qualitative Research on Healthcare Workers' Experiences Work Package (WP4)**

### 28 *Study Design*

29  
30 We will undertake qualitative research with HCWs to understand their experiences during the  
31  
32 COVID-19 pandemic. We will engage with clinical and ancillary staff from ethnic minority  
33  
34 and White backgrounds working in healthcare settings (e.g. frontline healthcare workers,  
35  
36 ancillary staff working in hospitals, community practitioners) to gain insight into their  
37  
38 perceptions around risk factors, support, coping mechanisms, and their mental and physical  
39  
40 health during the pandemic in order to inform response strategies to reduce COVID-19  
41  
42 morbidity and mortality in these individuals. We will conduct semi-structured interviews and  
43  
44 focus groups, which will enable in-depth explorations of individual participants' experiences  
45  
46 and perspectives (21), and also facilitate discussion between participants to explore both shared  
47  
48 and differing experiences and perspectives (22, 23)  
49  
50  
51  
52  
53  
54  
55

### 56 *Study Population*

1  
2  
3 Participants will consist of adult individuals ( $\geq 16$  years of age) with capacity to consent, from  
4 ethnic minority and White backgrounds with experience of working in healthcare settings  
5 during COVID-19, including both clinical and ancillary staff. We will recruit a purposive  
6 sample and will aim for theoretical saturation, including approximately 50 in-depth semi-  
7 structured interviews and focus groups with a total of approximately 100 participants.  
8 Saturation describes the point at which no new data or insights are being gained from interviews  
9 or focus groups (24), and so, it becomes methodologically unnecessary to continue recruiting  
10 new individuals. In total, we aim to recruit approximately 150 participants from different  
11 ethnicities, genders, job roles, hospital trusts and health boards, and UK regions to obtain a  
12 diverse sample.  
13  
14  
15  
16  
17  
18  
19  
20  
21  
22  
23  
24  
25

### 26 ***Data Collection***

27  
28 We will recruit participants through collaborators/partners/stakeholders, community  
29 organisations, and NHS organisations throughout the country. We will promote our research  
30 through posters, which will be advertised on site and digitally (e.g. online, by e-mail, and social  
31 media). Interested individuals will be able to contact the research team directly via the  
32 information provided on the poster. We will also work with gatekeepers in our partner and  
33 NHS organisations, who will send out communications regarding UK-REACH's qualitative  
34 research on healthcare workers' experiences to their networks or staff to facilitate recruitment.  
35 Additionally, a subset of cohort participants from the longitudinal cohort study (Work Package  
36 2) who have given their consent to be contacted for further research will be invited to participate  
37 in the interviews/focus groups.  
38  
39  
40  
41  
42  
43  
44  
45  
46  
47  
48  
49  
50  
51  
52

53 Semi-structured interviews and focus groups will be conducted by the research team informed  
54 by a topic guide. The topic guide has been developed in consultation with the PEP members  
55 and piloted before commencement of actual data collection to trial out the questions as well as  
56  
57  
58  
59  
60

1  
2  
3 the online processes. Key topics included in this guide are: exploring participants' experiences  
4 of working during COVID-19; their fears and concerns at work and outside of work; perceived  
5 risk factors; challenges faced in accessing information to keep themselves safe; concerns  
6 around stigma, discrimination and racism; and identifying facilitators and coping mechanisms.  
7  
8 To accommodate multiple participants, approximately 1.5 hours will be allocated to the focus  
9 groups compared to the 45-60 minutes for the one-to-one interviews. Following their  
10 participation, a token payment will be given to HCWs in recognition of their contribution to  
11 the research.  
12  
13

14  
15 The topic guide will be the same when engaging healthcare staff through focus groups or one-  
16 to-one interviews. As in Work Package 3, we will also collect basic demographic information  
17 about the participants using a short demographic data template. Interviews and focus groups  
18 will take place in a secure, virtual environment (e.g. Microsoft Teams) or via telephone at a  
19 time that is convenient to the participants. Where prior consent is given, interviews and focus  
20 groups will be recorded through the relevant software platform (e.g. using the recording feature  
21 in Microsoft Teams). Interview and focus group recordings will be transcribed by professional  
22 transcribers and pseudonymised before start of analysis. The transcriptions will be  
23 supplemented with notes taken by the researchers during the interviews and focus groups.  
24  
25  
26  
27  
28  
29  
30  
31  
32  
33  
34  
35  
36  
37  
38  
39  
40  
41  
42

### 43 ***Analysis Plan***

44  
45 Interview transcripts will be analysed using thematic analysis. Thematic analysis involves  
46 identifying themes or patterns in the data, lending coherence and order to it (25). Following  
47 Braun and Clarke's six stages of thematic analysis, we will read and re-read the transcripts to  
48 build familiarity with the data, generate initial codes to develop a coding framework, collate  
49 codes into broad themes, review the themes, define and name themes and finally write up the  
50 themes in a report form (26). We will primarily adopt an open inductive approach to develop  
51  
52  
53  
54  
55  
56  
57  
58  
59  
60



1  
2  
3 codes out of our data, but codes may also be developed from existing literature and/or  
4  
5 previously conducted research (25). Coding of data will be performed by the research team  
6  
7 using NVivo software, and three/four different members of the research team will triangulate  
8  
9 the coding process for credibility and rigour. Coding and theme development will be carried  
10  
11 out until data saturation is reached and no new themes are emerging.  
12  
13  
14

### 15 **Stakeholder Engagement Work Package (WP5)**

16  
17  
18 The rich diversity of the UK-REACH research will be complemented by a robust stakeholder  
19  
20 involvement and engagement strategy, which has been in-built into the project (WP5) and  
21  
22 conforms to the principles of (i) being receptive of public views and opinions, (ii) collaborating  
23  
24 and co-creating with the public, and (iii) involving the public in wider dissemination of results.  
25  
26 Within this work package, a Stakeholder Group (UK-REACH STAG) has been created to  
27  
28 provide feedback and insights, and support in the formulation and propagation of the project  
29  
30 recommendations. The group has membership from a range of partner stakeholder  
31  
32 organisations (e.g General Medical Council, Nursing and Midwifery Council) and associations  
33  
34 of ethnic minority professionals such as Filipino Nurses Association-UK (FNAUK), and  
35  
36 Association of Pakistani Physicians in Northern Europe (APPNE). The group will meet  
37  
38 virtually, once a month, until the end of the project, and will be governed by a set of terms of  
39  
40 reference (TOR). Group meetings will be chaired by a nominated healthcare worker  
41  
42 Chairperson/Deputy Chairperson, and a member of the research team will help with the  
43  
44 coordination. Common email forums may also be created for the group members to share their  
45  
46 views, opinions, and feedback amongst each other outside of the periodic meetings. Progress  
47  
48 with the delivery of other work packages, and where needed input from a stakeholder  
49  
50 perspective is sought through these meetings. The stakeholder group's primary approach is  
51  
52 through informal consensus building during the monthly meetings. Formal consensus  
53  
54  
55  
56  
57  
58  
59  
60

1  
2  
3 approaches such as Delphi may be used if a more challenging decision need arises during the  
4  
5 implementation of the project or for the purpose of optimising dissemination.  
6  
7

8 Views and opinions expressed by the group members will be aggregated, and individual names  
9  
10 will not appear in any of the published documents. Meeting minutes will only be shared with  
11  
12 the respective group members and on a need-to-know basis with members of the research team.  
13  
14 The UK-REACH STAG will also provide support in the dissemination of the project  
15  
16 recommendations.  
17  
18

## 19 20 **PATIENT AND PUBLIC INVOLVEMENT**

21  
22  
23 Public involvement has been a central tenet in the UK-REACH project since its early stages.  
24  
25 The project was developed in consultation and collaboration with national stakeholders  
26  
27 including the General Medical Council, Nursing and Midwifery Council, Royal Colleges and  
28  
29 ethnic minority HCW associations like British Association of Physicians of Indian Origin  
30  
31 (BAPIO). The public involvement and engagement component has been further streamlined  
32  
33 into the project with the creation of the Professional Expert Panel (PEP) comprising of  
34  
35 healthcare professionals in various roles and from different ethnic backgrounds. The group  
36  
37 members provide unique insight - relating to their professions and ethnic groups by virtue of  
38  
39 their lived experiences - to certain aspects of the project. The PEP meets virtually and has  
40  
41 provided inputs on the participant recruitment strategies for the different work packages, as  
42  
43 well as questionnaire for the cohort study, topic guides for WP3 and WP4, and other study-  
44  
45 related documents (e.g., text within participant-facing items). We will continue to consult the  
46  
47 PEP on other matters, such as data collection, analysis, reporting and even dissemination, as  
48  
49 the project progresses.  
50  
51  
52  
53  
54

## 55 56 **ETHICS AND DISSEMINATION**

### 57 58 59 *Informed Consent*

1  
2  
3 Prior to focus groups and interviews, potential participants will be given participant  
4 information sheets (PIS), which will detail the nature of the research, objectives, and any risks  
5 involved with participation. In light of COVID-19 constraints regarding face-to-face  
6 interaction, consent will be sought digitally (i.e., via a secure internet portal) from the  
7 participants and a downloadable version of the completed form will be available to participants  
8 for their record. The right to decline to participate, and to withdraw consent at any stage of the  
9 research, will be explicitly stated on both the PIS and in discussion with potential participants.  
10 It will be explicitly stated that their signing of the consent form at no point supersedes their  
11 right to withdraw from the study. The PIS also states that if a participant withdraws from the  
12 study after collection of data, the collected data will be stored and analysed by the research  
13 team, unless the participant specifically requests for removal of the data at the time of  
14 withdrawal. The opportunity will also be given before every interview and focus group for  
15 participants to ask any questions about the scope of the research, or their rights as participants  
16 throughout the consent process.  
17  
18  
19  
20  
21  
22  
23  
24  
25  
26  
27  
28  
29  
30  
31  
32  
33  
34  
35

### ***Psychologically or emotionally distressing conversations***

36  
37  
38  
39 Whilst this study is low risk, particularly with respect to Work Packages 3-5, we recognise that  
40 exploring and discussing experiences around COVID-19 and ethnicity (including issues of  
41 stigmatisation, structural injustice or racism) could be distressing to participants. We aim to  
42 manage this risk through the consent process, clearly explaining to individuals what the study  
43 entails, and giving ample opportunities to question the process and decline to take part if  
44 individuals wish. We also aim to make the interview process as comfortable as possible, and  
45 ensure participants know they may stop, take a break, or decide to withdraw from the interview  
46 and/or study at any point. The interview will always proceed at the comfort and discretion of  
47 the participant.  
48  
49  
50  
51  
52  
53  
54  
55  
56  
57  
58  
59  
60

### ***Confidentiality and data protection***

We will inform participants that participation will be confidential, and any personal information collected will be anonymised. Interview transcripts relating to individuals will also be pseudonymised using a unique numerical and date reference as the means to identify individual data sets. Such a system will ensure the anonymity of the participants and allow identification of individual data sets should a participant wish to exercise their individual rights (such as access, rectification, or erasure). Individual data and transcripts will be held in secure digital drives, and original recordings will be deleted after transcription. Access to the full data set will only be provided to the members of the research team. The only circumstance in which individual level data will be released is in the form of de-identified, anonymised excerpts within the final publication, which is a standard procedure in qualitative research of this type (27). The excerpts will take the form of words, sentences, and phrases the participants have provided which exemplify the coding framework and themes generated through the analysis.

### ***Dissemination of Results and Recommendations***

We will ensure that the findings from the Work Packages are reported rapidly and published on our public facing website ([www.uk-reach.org](http://www.uk-reach.org)). We have also enlisted the support of our stakeholders in disseminating the findings and recommendations through their organisational websites, newsletters, internal communications, blogs, or social media channels like Twitter. Following suggestions from our STAG members, we will also endeavour to make recommendations available in other languages such as Welsh, for greater uptake. In addition, we will make our findings available to the Scientific Advisory Group for Emergencies (SAGE) and other policymakers in a timely manner so that policy decisions can be made in near real-time. As a topic of immense public health significance, we will also endeavour to make our results available through print and electronic media. We will also publish the outputs of this

1  
2  
3 research in peer-reviewed journals in line with the University of Leicester's Open Access  
4 publication policy to enable us to share the results widely with the academic community. We  
5  
6 will also make presentations at relevant academic conferences as well as non-academic events  
7  
8 organised by our collaborators.  
9  
10

## 11 **DISCUSSION**

12  
13 UK-REACH, led by the University of Leicester, is one of the first studies in the world that sets  
14  
15 out to understand why HCWs from minority ethnic backgrounds are disproportionately  
16  
17 affected by COVID-19 as compared to their White counterparts. While emerging evidence  
18  
19 from epidemiological studies are pointing to varied COVID-19 outcomes among different  
20  
21 ethnic groups, not much is known about the reasons behind this variation. The qualitative Work  
22  
23 Packages of the project, i.e., WPs 3 & 4, are expected to generate evidence which will be crucial  
24  
25 in understanding some of the ethnicity-linked risk factors in COVID-19. The aim of the  
26  
27 stakeholder engagement work package is to disseminate this evidence widely and in a timely  
28  
29 manner. Additionally, our Ethico-legal Work Package will generate important guidance on  
30  
31 ways to minimise risks associated with research participation, and best practices in protecting  
32  
33 the rights and interests of participants. Through our qualitative study on HCWs experiences we  
34  
35 aim to increase knowledge about risk perceptions, support and coping mechanisms relevant to  
36  
37 COVID-19, which in turn will enable healthcare organisations to protect the mental and  
38  
39 physical health of ethnic minority staff. We appreciate the insights that stakeholders can bring  
40  
41 into our project and have enlisted their support from early-on to maximise our reach and impact.  
42  
43 It is the ultimate hope that through this project that we will gain clear insight into the differences  
44  
45 in COVID-19 clinical outcomes, professional practices, and well-being among ethnic minority  
46  
47 and White HCWs, in turn leading to a robust evidence basis for policymaking to minimise the  
48  
49 impacts of COVID-19 on HCWs across the UK.  
50  
51  
52  
53  
54  
55  
56  
57  
58  
59  
60

## Author Contributors

MP and ED conceived and designed WP3. LBN, MP, and AG conceptualised and designed WP4. IA and MP conceived and designed WP5. ED wrote the first draft of the WP3 protocol with inputs from RRB and MP; LBN wrote the first draft of the WP4 protocol with inputs from MP, AG, MG, AAO, OH and FW; MG wrote the first draft of the WP5 protocol with inputs from MP, IA and LBN. All authors were involved in writing, revising and approving the final manuscript. The UK-REACH Collaborative Group consists of all project collaborators who have conceptualised, designed, and acquired ethical approval for the project. They have all read, refined and approved the final manuscript.

## Funding

UK-REACH is supported by a grant (MR/V027549/1) from the MRC-UK Research and Innovation and the Department of Health and Social Care through the National Institute for Health Research (NIHR) rapid response panel to tackle COVID-19. Core funding was also provided by NIHR Biomedical Research Centres. MP is funded by a NIHR Development and Skills Enhancement Award and also acknowledges support from the NIHR Leicester BRC and NIHR ARC East Midlands. LBN is supported by the Academy of Medical Sciences (SBF005/1047). The views expressed in the publication are those of the author(s) and not necessarily those of the National Health Service (NHS), the NIHR or the Department of Health and Social Care.

This work is carried out with the support of BREATHE -The Health Data Research Hub for Respiratory Health [MC\_PC\_19004] funded through the UK Research and Innovation Industrial Strategy Challenge Fund and delivered through Health Data Research UK

## Competing Interest

1  
2  
3 All authors have completed the ICMJE uniform disclosure form at  
4 *www.icmje.org/coi\_disclosure.pdf* and declare: no support from any organisation for the  
5  
6 submitted work. MP reports grants and personal fees from Gilead Sciences and personal fees  
7  
8 from QIAGEN, outside the submitted work. IA reports personal fees from House of Lords,  
9  
10 grants from Bill and Melinda Gates Foundation and grants from NIHR, outside the submitted  
11  
12 work.  
13  
14  
15  
16  
17  
18  
19  
20  
21  
22  
23  
24  
25  
26  
27  
28  
29  
30  
31  
32  
33  
34  
35  
36  
37  
38  
39  
40  
41  
42  
43  
44  
45  
46  
47  
48  
49  
50  
51  
52  
53  
54  
55  
56  
57  
58  
59  
60

For peer review only

## REFERENCES

1. COVID-19 dashboard by the Center for Systems Science and Engineering (CSSE) at Johns Hopkins University (JHU) [Internet]. Johns Hopkins University (JHU). [Accessed 4th June 2021]. Available from: <https://coronavirus.jhu.edu/map.html>
2. Pan D, Sze S, Minhas JS, Bangash MN, Pareek N, Divall P, et al. The impact of ethnicity on clinical outcomes in COVID-19: A systematic review. *EClinicalMedicine*. 2020;23: 100404. Published online 2020 June. DOI: [10.1016/j.eclinm.2020.100404](https://doi.org/10.1016/j.eclinm.2020.100404)
3. Ali H, Alshukry A, Marafie SK, AlRukhayes M, Ali Y, Abbas MB, et al. Outcomes of COVID-19: Disparities by ethnicity. *Infection, Genetics and Evolution*. 2021;87:104639. DOI: [10.1016/j.meegid.2020.104639](https://doi.org/10.1016/j.meegid.2020.104639)
4. Karaca-Mandic P, Georgiou A, Sen S. Assessment of COVID-19 hospitalizations by race/ethnicity in 12 states. *JAMA internal medicine*. 2021;181(1):131-4. doi:10.1001/jamainternmed.2020.3857
5. (ONS) OfNS. Coronavirus (COVID-19) related deaths by ethnic group, England and Wales: 2 March 2020 to 10 April 2020. 2020. Available from: <https://www.ons.gov.uk/peoplepopulationandcommunity/birthsdeathsandmarriages/deaths/articles/coronavirusrelateddeathsbyethnicgroupenglandandwales/2march2020to10april2020>
6. Aldridge RW, Lewer D, Katikireddi SV *et al*. Black, Asian and Minority Ethnic groups in England are at increased risk of death from COVID-19: indirect standardisation of NHS mortality data [version 2; peer review: 3 approved]. *Wellcome Open Res* 2020, 5:88. DOI: <https://doi.org/10.12688/wellcomeopenres.15922.2>.
7. Martin CA, Jenkins DR, Minhas JS, Gray LJ, Tang J, Williams C, et al. Socio-demographic heterogeneity in the prevalence of COVID-19 during lockdown is associated with ethnicity and household size: Results from an observational cohort study. *EClinicalMedicine*. 2020;25. DOI: [10.1016/j.eclinm.2020.100466](https://doi.org/10.1016/j.eclinm.2020.100466)
8. Harrison EM, Docherty AB, Barr B, Buchan I, Carson G, Drake TM, et al. Ethnicity and outcomes from COVID-19: the ISARIC CCP-UK prospective observational cohort study of hospitalised patients. 2020. Available from: <https://dx.doi.org/10.2139/ssrn.3618215>
9. Lassale C, Gaye B, Hamer M, Gale CR, Batty GD. Ethnic disparities in hospitalisation for COVID-19 in England: The role of socioeconomic factors, mental health, and inflammatory and pro-inflammatory factors in a community-based cohort study. *Brain, Behavior, and Immunity*. 2020;88:44-49. DOI: doi: [10.1016/j.bbi.2020.05.074](https://doi.org/10.1016/j.bbi.2020.05.074)
10. Khunti K, Singh AK, Pareek M, Hanif W. Is ethnicity linked to incidence or outcomes of covid-19? *BMJ*. 2020;369:m1548. DOI: <https://doi.org/10.1136/bmj.m1548>
11. Pareek M, Bangash MN, Pareek N, Pan D, Sze S, Minhas JS, et al. Ethnicity and COVID-19: an urgent public health research priority. *The Lancet*. 2020;395(10234):1421-22. DOI: [10.1016/S0140-6736\(20\)30922-3](https://doi.org/10.1016/S0140-6736(20)30922-3)
12. Patel P, Hiam L, Sowemimo A, Devakumar D, McKee M. Ethnicity and covid-19. *BMJ*. 2020;369:m2282. DOI: <https://doi.org/10.1136/bmj.m2282>
13. Sze S, Pan D, Nevill CR, Gray LJ, Martin CA, Nazareth J, et al. Ethnicity and clinical outcomes in COVID-19: A systematic review and meta-analysis. *EClinicalMedicine*. Volumes 29-30, 2020, 100630, DOI: <https://doi.org/10.1016/j.eclinm.2020.100630>
14. Mathur, R, Rentsch, C.T., Morton, C.E., Hulme, W. J., Schultze, A., MacKenna, B., Eggo, R.M. et al. "Ethnic differences in SARS-CoV-2 infection and COVID-19-related hospitalisation, intensive care unit admission, and death in 17 million adults in England: an observational cohort study using the OpenSAFELY platform." *The Lancet* (2021), 397, 1711–1724. DOI: [10.1016/S0140-6736\(21\)00634-6](https://doi.org/10.1016/S0140-6736(21)00634-6)
15. Koh D. Occupational risks for COVID-19 infection. *Occup Med (Lond)*. 2020;70(1):3-5. DOI: [10.1093/occmed/kqaa036](https://doi.org/10.1093/occmed/kqaa036)



16. Chou R, Dana T, Buckley DI, Selph S, Fu R, Totten AM. Epidemiology of and Risk Factors for Coronavirus Infection in Health Care Workers. *Annals of Internal Medicine*. 2020;173(2):120-36. DOI: [10.7326/M20-1632](https://doi.org/10.7326/M20-1632)
17. Shah ASV, Wood R, Gribben C, Caldwell D, Bishop J, Weir A, et al. Risk of hospital admission with coronavirus disease 2019 in healthcare workers and their households: nationwide linkage cohort study. *BMJ*. 2020;371:m3582. DOI: <https://doi.org/10.1136/bmj.m3582>
18. Nguyen LH, Drew DA, Graham MS, Joshi AD, Guo C-G, Ma W, et al. Risk of COVID-19 among front-line health-care workers and the general community: a prospective cohort study. *The Lancet Public Health*. 2020;5(9):e475-e83. DOI: [https://doi.org/10.1016/S2468-2667\(20\)30164-X](https://doi.org/10.1016/S2468-2667(20)30164-X)
19. Cook T, Kursumovic E, Lennane S. Exclusive: deaths of NHS staff from covid-19 analysed. *Health Service Journal*. 2020;22 April. Available from: <https://www.hsj.co.uk/exclusive-deaths-of-nhs-staff-from-covid-19-analysed/7027471.article>
20. Karlsson U, Fraenkel C-J. Covid-19: risks to healthcare workers and their families. *BMJ*. 2020;371:m3944. DOI: [10.1136/bmj.m3944](https://doi.org/10.1136/bmj.m3944)
21. Wengraf T. Qualitative research interviewing: Biographic narrative and semi-structured methods: Sage; 2001.
22. Ochieng P. An analysis of the strengths and limitation of qualitative and quantitative research paradigms. *Problems of Education in the 21st Century*. 2009;13:13. Available from: <http://oaji.net/articles/2014/457-1393665925.pdf>
23. Leung F-H, Savithiri R. Spotlight on focus groups. *Can Fam Physician*. 2009;55(2):218-19.
24. Saunders B, Sim J, Kingstone T, Baker S, Waterfield J, Bartlam B, et al. Saturation in qualitative research: exploring its conceptualization and operationalization. *Qual Quant*. 2018;52(4):1893-907. DOI: [10.1007/s11135-017-0574-8](https://doi.org/10.1007/s11135-017-0574-8).
25. Boyatzis RE. Transforming qualitative information: Thematic analysis and code development: Sage; 1998.
26. Braun V, Clarke V. Using thematic analysis in psychology. *Qualitative Research in Psychology*. 2006;3(2):77-101. DOI: [10.1191/1478088706qp063oa](https://doi.org/10.1191/1478088706qp063oa)
27. Corden A, Sainsbury R. Using verbatim quotations in reporting qualitative social research: researchers' views. 2006. Available from: <https://www.york.ac.uk/inst/spru/pubs/pdf/verbquotresearch.pdf>

1  
2  
3 § UK-REACH Collaborative Group Members  
4  
5  
6

- 7 1. Manish Pareek, University of Leicester, UK  
8  
9 2. Laura Gray , University of Leicester, UK  
10  
11 3. Laura B. Nellums, University of Nottingham, UK  
12  
13 4. Anna Guyatt, University of Leicester, UK  
14  
15 5. Catherine Johns, University of Leicester, UK  
16  
17 6. Chris McManus, University College London, UK  
18  
19 7. Katherine Woolf, University College London, UK  
20  
21 8. Ibrahim Abubakar, University College London, UK  
22  
23 9. Amit Gupta, Oxford University Hospitals NHS Foundation Trust, UK  
24  
25 10. Keith Abrams, University of York, UK  
26  
27 11. Martin Tobin, University of Leicester, UK  
28  
29 12. Louise Wain, University of Leicester, UK  
30  
31 13. Sue Carr, University Hospital Leicester, UK  
32  
33 14. Edward Dove, University of Edinburgh, UK  
34  
35 15. Kamlesh Khunti, University of Leicester, UK  
36  
37 16. David Ford, Swansea University, UK  
38  
39 17. Rob Free, University of Leicester, UK  
40  
41  
42  
43  
44  
45  
46  
47  
48  
49  
50  
51  
52  
53  
54  
55  
56  
57  
58  
59  
60
